# Supplementary material for: Socioeconomic factors and outcomes from exercise-related sudden cardiac arrest in high school student-athletes in the USA
Source: HighWire-hosted journal article supplement (doi:10.1136/bjsports-2021-104486), 2021-10-29
Supplement: bjsports-2021-104486supp001_data_supplement.pdf [file bjsports-2021-104486supp001_data_supplement.pdf]

**Supplement Table 1. Modified Poisson Regression with Robust Standard Errors Analysis of Athlete and Event Characteristics and School Socioeconomic Indicators with Survival from Exercise-Related Sudden Cardiac Arrest in High School Student-Athletes, July 1, 2014 to June 30, 2018**

| Variable                        |                                 | Unadjusted  |      |      |          | Fully adjusted<br>SES and year indicator variables* |      |      |          |
|---------------------------------|---------------------------------|-------------|------|------|----------|-----------------------------------------------------|------|------|----------|
|                                 |                                 | RR          | LCL  | UCL  | p> Z     | RR                                                  | LCL  | UCL  | p> Z     |
| Female sex                      | Yes                             | <b>0.78</b> | 0.46 | 1.31 | P=0.3393 | <b>0.87</b>                                         | 0.36 | 2.10 | P=0.7582 |
|                                 | No                              | <b>1.00</b> |      |      | --       | <b>1.00</b>                                         |      |      | --       |
| Minority status                 | Yes                             | <b>0.67</b> | 0.49 | 0.92 | P=0.0144 | <b>0.76</b>                                         | 0.52 | 1.13 | P=0.1744 |
|                                 | No                              | <b>1.00</b> |      |      | --       | <b>1.00</b>                                         |      |      | --       |
| AT employment                   | Yes                             | <b>1.41</b> | 0.79 | 2.52 | P=0.2455 | <b>1.64</b>                                         | 0.65 | 4.10 | P=0.2931 |
|                                 | No                              | <b>1.00</b> |      |      | --       | <b>1.00</b>                                         |      |      | --       |
| Academic year                   | 2014-2015                       | <b>1.00</b> |      |      | --       | <b>1.00</b>                                         |      |      | --       |
|                                 | 2015-2016                       | <b>1.01</b> | 0.67 | 1.54 | P=0.9557 | <b>1.06</b>                                         | 0.58 | 1.92 | P=0.8515 |
|                                 | 2016-2017                       | <b>1.22</b> | 0.84 | 1.77 | P=0.3013 | <b>1.30</b>                                         | 0.80 | 2.13 | P=0.2922 |
|                                 | 2017-2018                       | <b>1.30</b> | 0.91 | 1.85 | P=0.1519 | <b>1.35</b>                                         | 0.88 | 2.07 | P=0.1754 |
| Median Household Income         | 0-10 <sup>th</sup> percentile   | <b>0.87</b> | 0.53 | 1.43 | P=0.5854 | <b>1.23</b>                                         | 0.66 | 2.28 | P=0.5135 |
|                                 | 20-80 <sup>th</sup> percentile  | <b>1.00</b> |      |      | --       | <b>1.00</b>                                         |      |      | --       |
|                                 | 90-100 <sup>th</sup> percentile | <b>1.22</b> | 0.89 | 1.67 | P=0.2150 | <b>1.15</b>                                         | 0.59 | 2.24 | P=0.6707 |
| Free/reduced lunch proportion   | 0-10 <sup>th</sup> percentile   | <b>1.13</b> | 0.77 | 1.66 | P=0.5197 | <b>1.00</b>                                         | 0.49 | 2.01 | P=0.9934 |
|                                 | 20-80 <sup>th</sup> percentile  | <b>1.00</b> |      |      | --       | <b>1.00</b>                                         |      |      | --       |
|                                 | 90-100 <sup>th</sup> percentile | <b>0.65</b> | 0.31 | 1.37 | P=0.2555 | <b>0.86</b>                                         | 0.31 | 2.42 | P=0.7755 |
| Proportion of minority students | 0-10 <sup>th</sup> percentile   | <b>1.18</b> | 0.84 | 1.66 | P=0.3437 | <b>1.04</b>                                         | 0.61 | 1.78 | P=0.8898 |
|                                 | 20-80 <sup>th</sup> percentile  | <b>1.00</b> |      |      | --       | <b>1.00</b>                                         |      |      | --       |
|                                 | 90-100 <sup>th</sup> percentile | <b>0.67</b> | 0.35 | 1.3  | P=0.2372 | <b>0.93</b>                                         | 0.37 | 2.32 | P=0.8812 |

\*median household income, free reduced lunch, minority status and year are included in the model as indicator variables. Referent category noted. Does not assume linear relationship.

\*\*median household income, free reduced lunch, minority status and year are included in the model as continuous ordinal variables (SES variables 3 level and Year 4-level). Assume a linear relationship between outcome and SES and year. Justification is the linear/dose response trend in the tertile variables for SES and the year variable.

## Not included in the multivariate model

| Variable                    |                                 | Unadjusted  |      |      |          | Adjusted |     |     |      |
|-----------------------------|---------------------------------|-------------|------|------|----------|----------|-----|-----|------|
|                             |                                 | RR          | LCL  | UCL  | p> Z     | RR       | LCL | UCL | p> Z |
| <b>Median family income</b> | 0-10 <sup>th</sup> percentile   | <b>0.87</b> | 0.53 | 1.43 | P=0.5854 | --       | --  | --  | --   |
|                             | 20-80 <sup>th</sup> percentile  | <b>1.00</b> |      |      |          | --       | --  | --  | --   |
|                             | 90-100 <sup>th</sup> percentile | <b>1.22</b> | 0.89 | 1.67 | P=0.2150 | --       | --  | --  | --   |
| <b>Academic year binary</b> | 1                               | <b>1.25</b> | 0.97 | 1.62 | P=0.0905 | --       | --  | --  | --   |

**Supplement Table 2. Resuscitation Details for Cases of Exercise-Related Sudden Cardiac Arrest and Survival on High School Campuses, July 1, 2014 to June 30, 2018**

|                                  | Sudden Cardiac<br>Arrest with Survival<br>n (%) | Sudden Cardiac<br>Death<br>n (%) | Total<br>n (%) |
|----------------------------------|-------------------------------------------------|----------------------------------|----------------|
| <b>Witnessed arrest?</b>         |                                                 |                                  |                |
| Yes                              | 74 (99)                                         | 33 (92)                          | 107 (96)       |
| No                               | 1 (1)                                           | 3 (8)                            | 4 (4)          |
| Unknown                          | 0 (0)                                           | 0 (0)                            | 0 (0)          |
| <b>Bystander CPR performed?</b>  |                                                 |                                  |                |
| Yes                              | 70 (93)                                         | 18 (50)                          | 88 (79)        |
| No                               | 0 (0)                                           | 0 (0)                            | 0 (0)          |
| Unknown                          | 5 (7)                                           | 18 (50)                          | 23 (21)        |
| <b>On-site AED?</b>              |                                                 |                                  |                |
| Yes                              | 55 (73)                                         | 10 (28)                          | 65 (59)        |
| No                               | 1 (1)                                           | 0 (0)                            | 1 (1)          |
| Unknown                          | 19 (25)                                         | 26 (72)                          | 45 (41)        |
| <b>AED used?</b>                 |                                                 |                                  |                |
| Yes                              | 52 (69)                                         | 9 (25)                           | 61 (55)        |
| No                               | 10 (13)                                         | 5 (14)                           | 15 (14)        |
| Unknown                          | 13 (17)                                         | 22 (61)                          | 35 (32)        |
| <b>Athletic trainer on-site?</b> |                                                 |                                  |                |
| Yes                              | 38 (51)                                         | 8 (22)                           | 46 (41)        |
| No                               | 4 (5)                                           | 1 (3)                            | 5 (5)          |
| Unknown                          | 33 (44)                                         | 27 (75)                          | 60 (54)        |
| <b>EMS defibrillator used?</b>   |                                                 |                                  |                |
| Yes                              | 9 (12)                                          | 5 (14)                           | 14 (13)        |
| No                               | 29 (39)                                         | 0 (0)                            | 29 (26)        |
| Unknown                          | 37 (49)                                         | 31 (86)                          | 68 (61)        |
| <b>Total</b>                     | <b>75</b>                                       | <b>36</b>                        | <b>111</b>     |

CPR= cardiopulmonary resuscitation, AED= automated external defibrillator, EMS= emergency medical services
